# Supplementary material for: Light weight and flexible poly(ether ether ketone) based composite film with excellent thermal stability and mechanical properties for wide-band electromagnetic interference shielding
Source: Royal Society of Chemistry journal article supplement (doi:10.1039/c7ra11675f), 2018-01-01
Supplement: c7ra11675f1.pdf [file c7ra11675f1.pdf]

## Electronic Supplementary Information†

Cite this: DOI: 10.1039/x0xx00000x

### **Light weight and flexible poly(ether ether ketone) based composite film with excellent thermally stable and mechanical properties for wide-band electromagnetic interference shielding**

Ruiqi Na,<sup>a</sup> Jinying Liu,<sup>b</sup> Guibin Wang<sup>a</sup> and Shuling Zhang<sup>a\*</sup>

<sup>a</sup>National& Local Joint Engineering Laboratory for Synthesis Technology of High Performance Polymer, College of Chemistry, Jilin University, Changchun, 130012, P. R. China. E-mail: zsl@jlu.edu.cn; Tel/Fax: (+86) 0431-85168868.

<sup>b</sup>Changchun Applied Chemistry Corporation Chinese Academy of Sciences, Changchun, 130012, P. R. China.

### **Electronic supplementary information for:**

1. The dimensions of film samples in EMI shielding test. (Table S1)
2. TGA curves of PEEK/MWCNT composites with different GPPS contents. (Figure S1)
3. Comparisons of AC conductivities and thermal stabilities between PEEK/MWCNT/GPPS1.0 and PEEK/wrapped MWCNT/GPPS1.0 composite films. (Figure S2)
4. The detailed EMI SE and specific EMI SE of PEEK/wrapped MWCNT/GPPS1.0 film (9 wt% wrapped MWCNT) at various frequencies. (Table S2)

## 1. The dimensions of film samples in EMI shielding test.

**Table S1** The precisely dimensions of film samples at different frequency band in EMI shielding test.

| Frequency band (GHz) | Length (mm) | Width (mm) | Thickness (mm) |
|----------------------|-------------|------------|----------------|
| 8.2-12.4 (X band)    | 22.90       | 10.20      | 0.18           |
| 12.4-18 (Ku band)    | 15.90       | 8.03       | 0.18           |
| 18-26.5 (K band)     | 10.95       | 4.50       | 0.18           |
| 26.5-40 (Ka band)    | 7.15        | 3.60       | 0.18           |

## 2. TGA curves of PEEK/MWCNT composites with different GPPS contents.

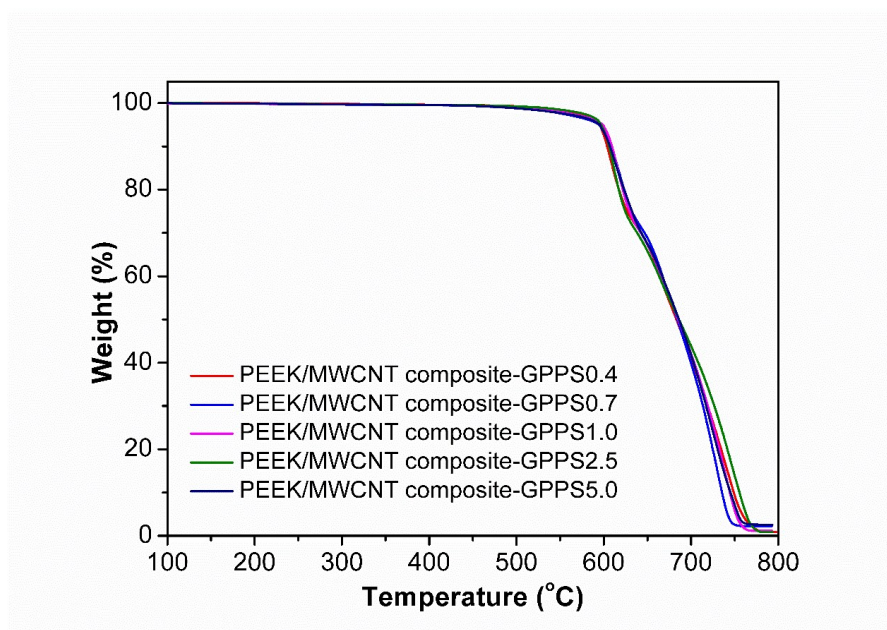

**Figure S1** TGA curves of PEEK/MWCNT composite-GPPSx.

**3. Comparisons of AC conductivities and thermal stabilities between PEEK/MWCNT/GPPS1.0 and PEEK/wrapped MWCNT/GPPS1.0 composite films.**

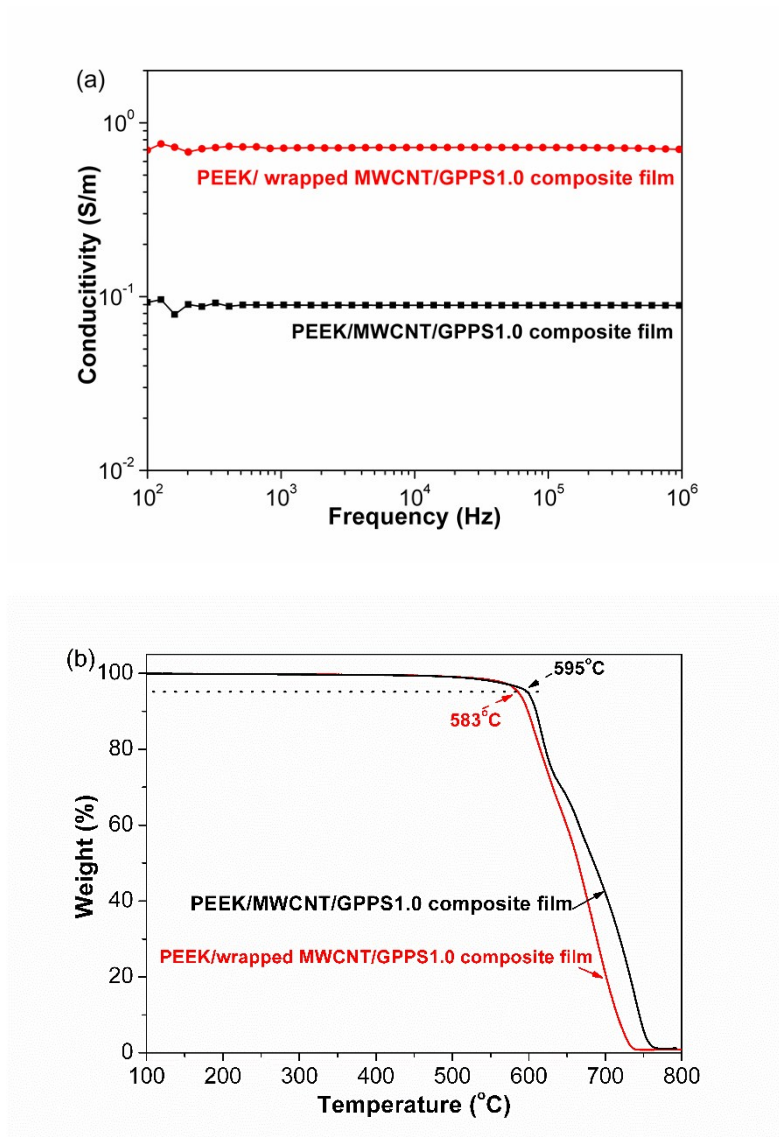

**Figure S2** Comparisons of (a) AC conductivities and (b) thermal stabilities between PEEK/MWCNT/GPPS1.0 and PEEK/wrapped MWCNT/GPPS1.0 composite films (the weight ratio of the wrapped MWCNT or MWCNT are 7 wt%).

**4. The detailed EMI SE and specific EMI SE of PEEK/wrapped MWCNT/GPPS1.0 film (9 wt% wrapped MWCNT) at various frequencies.**

**Table S2** The detailed EMI SE and specific EMI SE of PEEK/wrapped MWCNT/GPPS1.0 film (9 wt% wrapped MWCNT) at various frequencies.

| <b>Frequency<br/>(GHz)</b> | <b>SE<br/>(dB)</b> | <b>SSE<sup>a</sup><br/>(dB mm<sup>-1</sup>)</b> | <b>Frequency<br/>(GHz)</b> | <b>SE<br/>(dB)</b> | <b>SSE<sup>a</sup><br/>(dB mm<sup>-1</sup>)</b> |
|----------------------------|--------------------|-------------------------------------------------|----------------------------|--------------------|-------------------------------------------------|
| 8.2                        | 11.8               | 65.3                                            | 22.0                       | 18.4               | 102.1                                           |
| 10.0                       | 10.3               | 57.4                                            | 24.0                       | 15.3               | 85.0                                            |
| 12.4                       | 10.0               | 55.8                                            | 26.5                       | 15.2               | 84.4                                            |
| 14.0                       | 9.9                | 54.8                                            | 30.0                       | 16.7               | 92.5                                            |
| 16.0                       | 9.1                | 50.6                                            | 33.0                       | 16.2               | 89.9                                            |
| 18.0                       | 9.3                | 51.6                                            | 36.0                       | 16.6               | 92.4                                            |
| 20.0                       | 18.5               | 102.8                                           | 40.0                       | 16.1               | 89.7                                            |

<sup>a</sup>SSE: Specific EMI SE.
